# Supplementary material for: Feasibility of Dose Escalation in Patients With Intracranial Pediatric Ependymoma
Source: Front Oncol. 2019 Jun 21;9:531. doi: 10.3389/fonc.2019.00531 (PMC6598548; doi:10.3389/fonc.2019.00531)
Supplement: Supplementary file 2 [file Table_2.DOCX]

**Supplementary Table 2**

Criteria for Plan Validation

| Structure | Dose contraint |
| --- | --- |
| PTV67.6 Gy | D50% = 67.6 y  D95% > 95%Dprescr HR  D98% > 90% Dprescr HR  D0% > 107% Dprescr HR |
| PTV59.4 Gy -PTV67.6 Gy | D95% > 95% Dprescr LR  D98% > 90% Dprescr LR |
| Chiasm | Dmax < 54 Gy |
| Brainstem | Dmean < 54 Gy  Dmax < 6422 Gy  1‑10 cc < 59 Gy |
| Pituitary gland | Dmean < 16 Gy |
| Inner ear R/L | Dmax < 50 Gy  Dmean < 35 Gy |
| Cochlea R/L | Dmax < 50 Gy  Dmean < 35 Gy |
| Eye R/L | Dmean < 40 Gy |
| Lens R/L | Dmax < 10 Gy |
| Optic nerves | Dmax < 50 Gy |
| Temporal lobes | Dmax < 60 Gy |
| Spinal cord | Dmax < 54 Gy |
| Brain PTV | Dmean < 20 Gy |
